# Supplementary material for: Development and Validation of a Model for Laparoscopic Colorectal Surgical Instrument Recognition Using Convolutional Neural Network–Based Instance Segmentation and Videos of Laparoscopic Procedures
Source: PubMed Central journal article supplement — JAMA Netw Open. 2022 Aug 19;5(8):e2226265. doi: 10.1001/jamanetworkopen.2022.26265 (PMC9391983; doi:10.1001/jamanetworkopen.2022.26265), 2022-08-19

## Supplementary Online Content

Kitaguchi D, Lee Y, Hayashi K, et al. Development and validation of a model for laparoscopic colorectal surgical instrument recognition using convolutional neural network–based instance segmentation and videos of laparoscopic procedures. *JAMA Netw Open*. 2022;5(8):e2226265. doi:10.1001/jamanetworkopen.2022.26265

**eFigure.** Mean Average Precision Values at Multiple Thresholds Ranging From 0.5 to 0.95

This supplementary material has been provided by the authors to give readers additional information about their work.

**eFigure.** Mean Average Precision Values at Multiple Thresholds Ranging From 0.5 to 0.95

| IoU  | mAP   | SD       |
|------|-------|----------|
| 0.5  | 94.08 | 0.443847 |
| 0.65 | 93.22 | 0.402492 |
| 0.75 | 91.86 | 0.336155 |
| 0.8  | 90.56 | 0.343511 |
| 0.85 | 87.94 | 0.384708 |
| 0.9  | 80.8  | 0.707107 |
| 0.95 | 51.32 | 0.944458 |

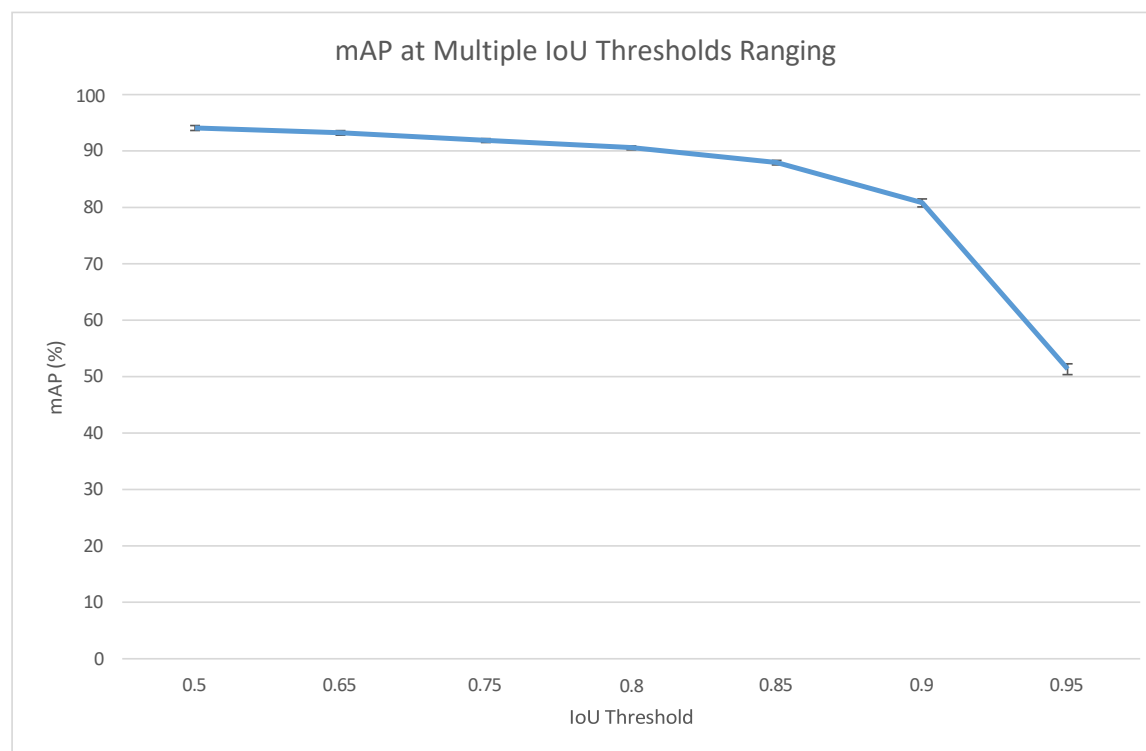

Supplement: jamanetwopen-e2226265-s001.pdf [file jamanetwopen-e2226265-s001.pdf]
